# Supplementary material for: Enhancement of Transgene Expression by Mild Hypothermia Is Promoter Dependent in HEK293 Cells
Source: MDPI journal article supplement (doi:10.3390/life11090901), 2021-08-30

# Enhancement of Transgene Expression by Mild Hypothermia is Promoter-Dependent in HEK293 Cells

Min Ho Jang <sup>†</sup>, Honggi Min <sup>†</sup> and Jae Seong Lee <sup>\*</sup>

Department of Molecular Science and Technology, Ajou University, Suwon 16499, Korea; minho00123@ajou.ac.kr (M.H.J.); minhk96@ajou.ac.kr (H.M.)

<sup>\*</sup> Correspondence: jaeseonglee@ajou.ac.kr

<sup>†</sup> These authors contributed equally to this work.

## Supplementary Materials

**Table S1.** List of common transcription factors identified from comparison of *in silico* analysis of CMV-enhancer specific transcription factors and significant DEG lists from RNA-seq analysis.

| Gene Symbol    | Gene Description                                      | Fold Change (32 °C versus 37 °C) |
|----------------|-------------------------------------------------------|----------------------------------|
| <i>FOS</i>     | Fos proto-oncogene, AP-1 transcription factor subunit | −3.86 ( $3.25 \times 10^{-34}$ ) |
| <i>RFX3</i>    | regulatory factor X3                                  | −2.22 ( $8.52 \times 10^{-6}$ )  |
| <i>PRRX2</i>   | paired related homeobox 2                             | −2.03 ( $5.42 \times 10^{-3}$ )  |
| <i>FOSL1</i>   | FOS like 1, AP-1 transcription factor subunit         | −4.51 ( $1.94 \times 10^{-10}$ ) |
| <i>LBX2</i>    | ladybird homeobox 2                                   | −3.00 ( $3.23 \times 10^{-6}$ )  |
| <i>JDP2</i>    | Jun dimerization protein 2                            | −4.31 ( $1.80 \times 10^{-22}$ ) |
| <i>NEUROG2</i> | neurogenin 2                                          | 2.17 ( $3.71 \times 10^{-7}$ )   |
| <i>EBF1</i>    | EBF transcription factor 1                            | −2.06 ( $1.97 \times 10^{-3}$ )  |
| <i>ETV1</i>    | ETS variant 1                                         | −2.67 ( $8.10 \times 10^{-8}$ )  |
| <i>ETV2</i>    | ETS variant 2                                         | 2.61 ( $2.35 \times 10^{-4}$ )   |
| <i>NKX3-1</i>  | NK3 homeobox 1                                        | 2.59 ( $6.02 \times 10^{-18}$ )  |
| <i>ONECUT3</i> | one cut homeobox 3                                    | −3.08 ( $3.41 \times 10^{-6}$ )  |
| <i>HOXD9</i>   | homeobox D9                                           | −2.25 ( $1.59 \times 10^{-13}$ ) |
| <i>INSM1</i>   | INSM transcriptional repressor 1                      | −3.03 ( $1.68 \times 10^{-12}$ ) |

**Table S2.** Primer sequences used for RT-PCR and RT-qPCR.

| Gene                  | Direction | Sequence (5'-3')        |
|-----------------------|-----------|-------------------------|
| <i>ACTB</i>           | Forward   | CTGGAACGGTGAAGGTGACA    |
|                       | Reverse   | AAGGGACTTCCTGTAACAACGCA |
| <i>ETV2</i> isoform 1 | Forward   | AGCAGAGACATGCTGGAAAG    |
|                       | Reverse   | GGAACCTTCTGGGTGCAGTAA   |
| <i>ETV2</i> isoform 2 | Forward   | CGCACGGACTGTACCATTT     |
|                       | Reverse   | GCTCTGGTACCGCTTCAAA     |
| <i>NEUROG2</i>        | Forward   | CTGGGTCTGGTACACGATTG    |
|                       | Reverse   | CAGTCTACGGGTCTTCTTGATG  |
| <i>NKX3-1</i>         | Forward   | CGGAGACCCAAGTGAAGATATG  |
|                       | Reverse   | CAAAGAGGAGTGCTTCTCCAA   |

**Table S3.** Comparison of fold changes in DEGs identified by RNA-seq and RT-qPCR.

| Gene           | Fold Change of DEGs (32 °C versus 37 °C) |                        |
|----------------|------------------------------------------|------------------------|
|                | RNA-seq (raw p-value)                    | RT-qPCR <sup>a</sup>   |
| <i>ETV2</i>    | 2.61 ( $2.35 \times 10^{-4}$ )           | 1.36/1.12 <sup>b</sup> |
| <i>NEUROG2</i> | 2.17 ( $3.71 \times 10^{-7}$ )           | 1.24                   |
| <i>NKX3-1</i>  | 2.59 ( $6.02 \times 10^{-18}$ )          | 2.02                   |

<sup>a</sup> Human *ACTB* gene was used as a reference gene. Average values obtained in triplicate experiments are shown. <sup>b</sup> *ETV2* isoform 1 / *ETV2* isoform 2.

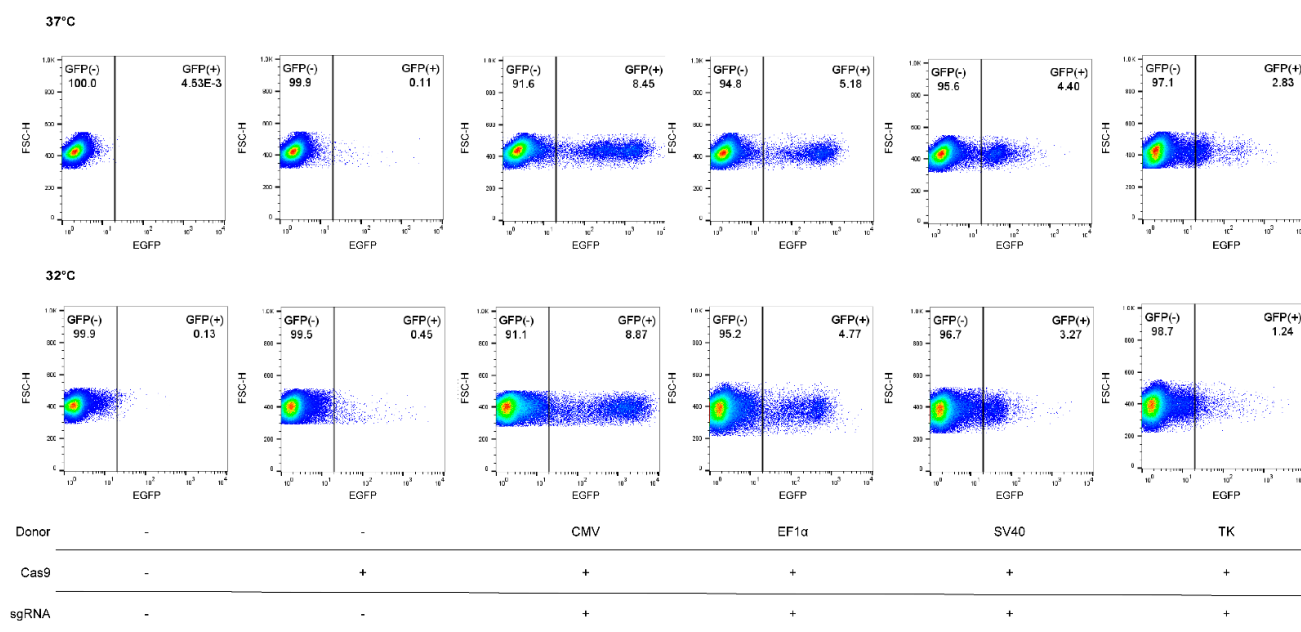**Figure S1.** Representative flow cytometry plots and gates of CRISPR/Cas9-mediated targeted integration of promoter sequences at the AAVS1 locus shown in Figure 1B.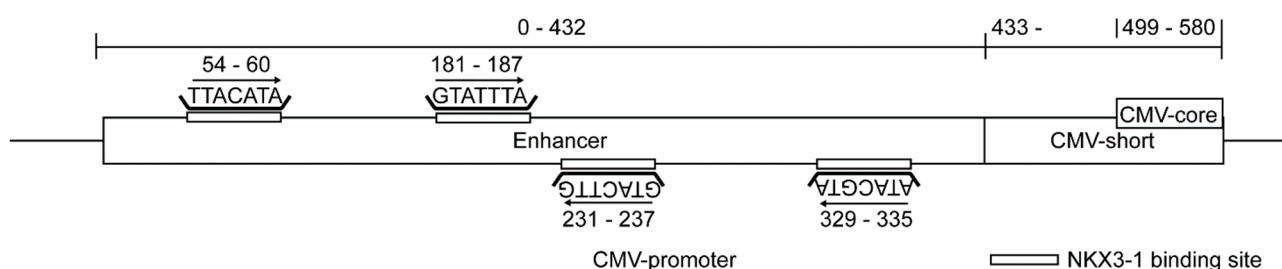**Figure S2.** Schematic representation of the short variants of the CMV promoter. Predicted binding sites of NKX3-1 on the CMV-enhancer region are shown.

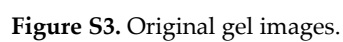

Supplement: s1 [file s1]
